# Supplementary material for: Screening Plasma Exosomal RNAs as Diagnostic Markers for Cervical Cancer: An Analysis of Patients Who Underwent Primary Chemoradiotherapy
Source: Biomolecules. 2021 Nov 14;11(11):1691. doi: 10.3390/biom11111691 (PMC8615616; doi:10.3390/biom11111691)
Supplement: Supplementary file 1 [file biomolecules-11-01691-s001.zip]

Archive with 4 entries (4 files):
- exosome isolation protocols using Exo2D.pdf
- RNA extraction protocols using miRNeasy SerumPlasma Kit.pdf
- Supplementary_figures and legends.pdf
- Supplementary_method_R1.pdf
